# Supplementary material
Source: PubMed Central journal article supplement (PMC4116744)
Supplement: NIHMS603615-supplement-Supplementary_data.pdf [file NIHMS603615-supplement-Supplementary_data.pdf]

## Supporting Information

### **Prostaglandin A<sub>2</sub> Enhances Cellular Insulin Sensitivity via a Mechanism that Involves the Orphan Nuclear Receptor NR4A3**

#### **Authors**

Xiaolin Zhu<sup>1</sup>, R GracevWalton<sup>2</sup>, Ling Tian<sup>1</sup>, Nanlan Luo<sup>2</sup>, Shih-Rong Ho<sup>1</sup>,  
Yuchang Fu<sup>2</sup>, W. Timothy Garvey<sup>2,3</sup>

#### **Affiliations**

<sup>1</sup>Department of Cell Biology, University of Alabama at Birmingham, Birmingham,  
USA

<sup>2</sup>Department of Nutrition Sciences, University of Alabama at Birmingham,  
Birmingham, USA

<sup>3</sup>the Birmingham Veterans Affairs Medical Center, Birmingham, USA

#### **Correspondence**

Xiaolin Zhu

Department of Nutrition Sciences

The University of Alabama at Birmingham

1675 University Boulevard,

Birmingham, AL 35294-3360

Tel.: +1/205/996 2660

Fax: +1/205/934 7049

E-mail: [xiaolin@uab.edu](mailto:xiaolin@uab.edu)

Figure S1A

Days after differentiation

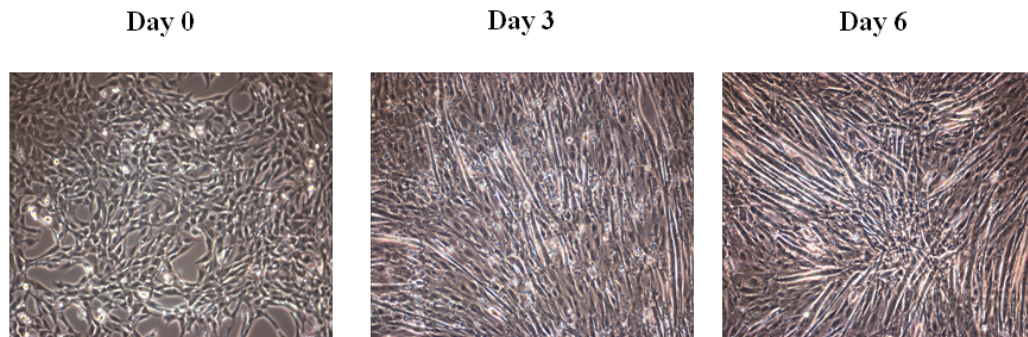

Figure S1B

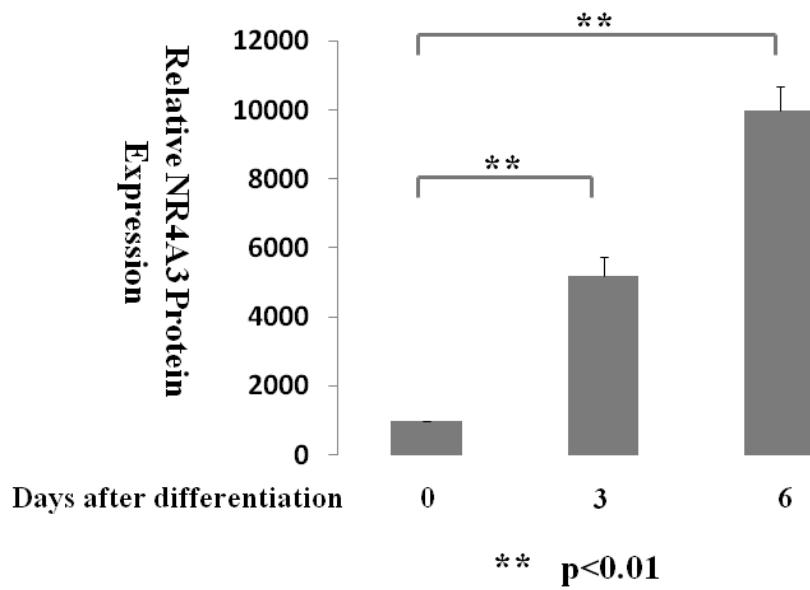

Figure S1C

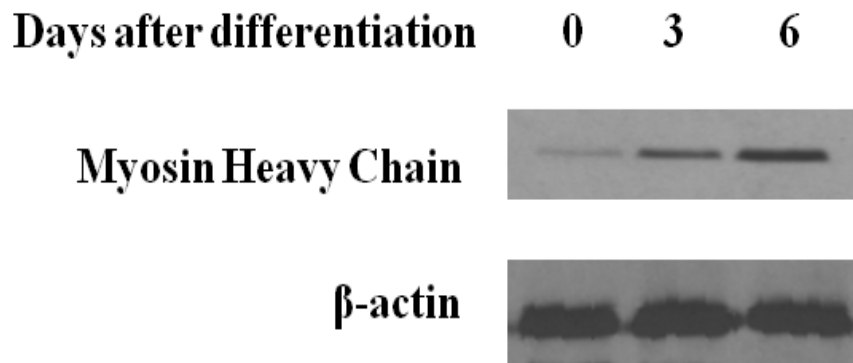

Figure S1: The proper differentiation of wild type C2C12 cells. A) Images of C2C12 myoblasts at basal level, 3 days after differentiation and 6 days of differentiation. B) Quantification of NR4A3 protein expression at day 0, 3 days after differentiation and 6 days after differentiation. C) The myosin heavy chain protein expression in C2C12 cells before and after differentiation. All data are representatives over three time of independent experiments.

Figure S2A

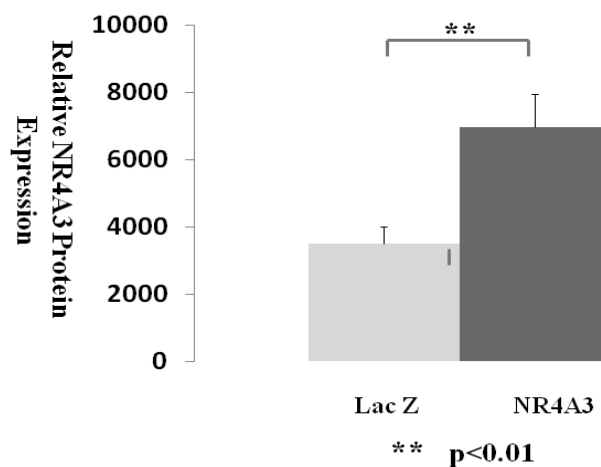

Figure S2B

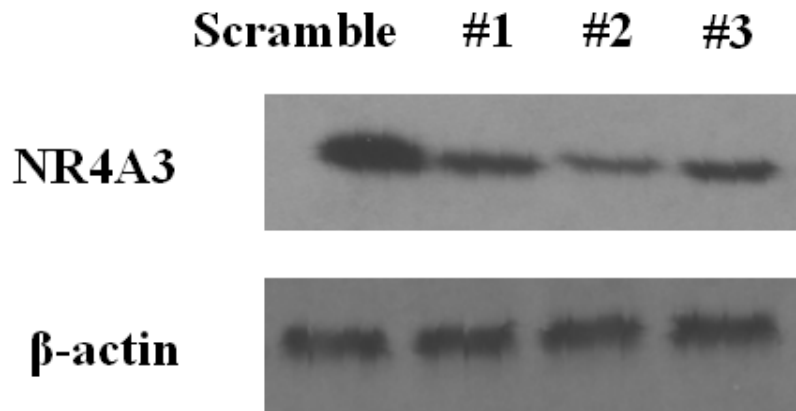

Figure S2C

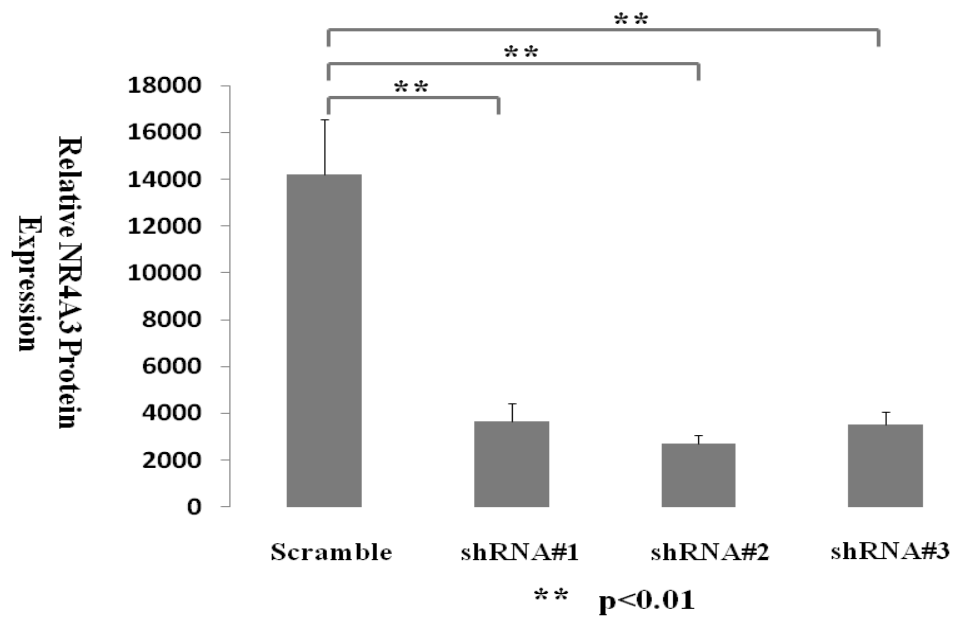

Figure S2D

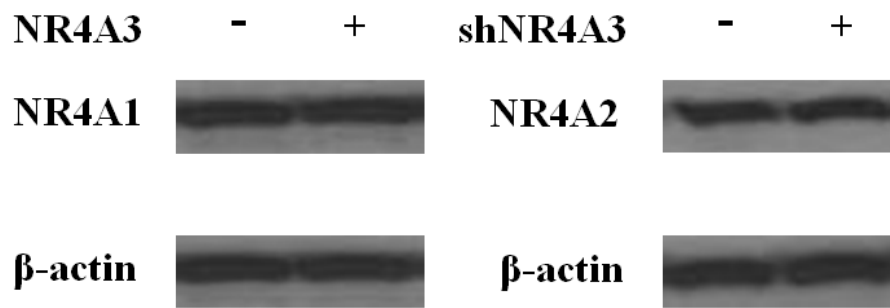

Figure S2E

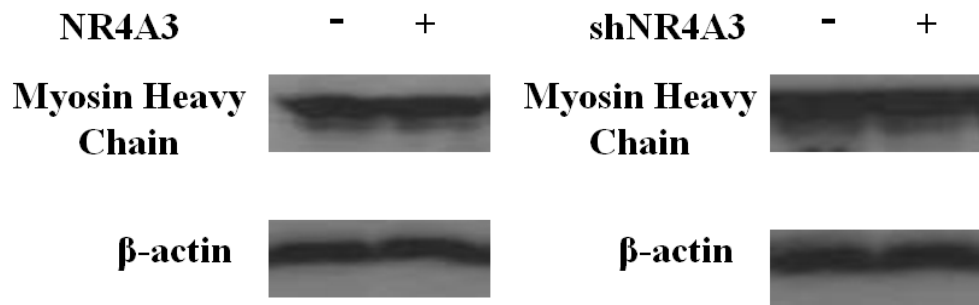

Figure S2F

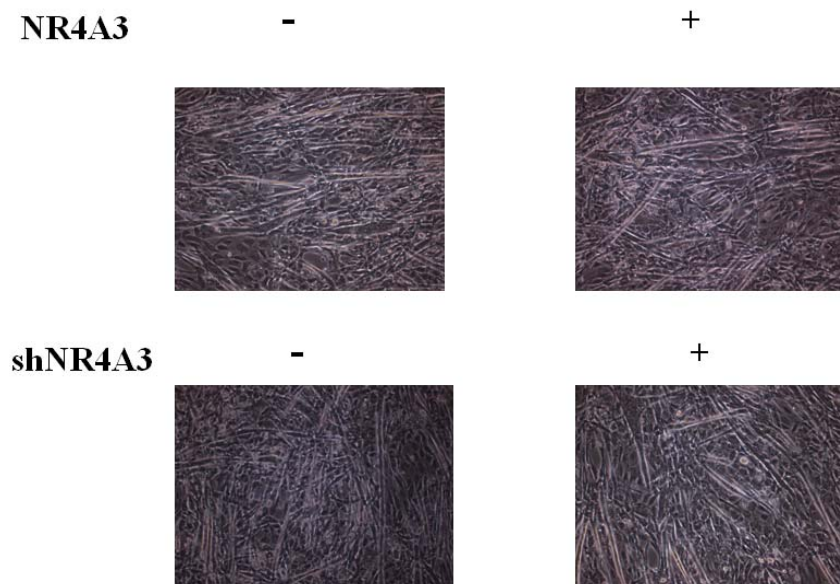

Figure S2: Characterization of NR4A3 hyperexpression and knock-down cell line. A) Quantification of NR4A3 protein expression in NR4A3 hyperexpressing C2C12 myocytes. B) NR4A3 knockdown by three different shRNAs. C) Quantification of NR4A3 knockdown effects by 3 shRNAs. D) NR4A1 and NR4A2 protein expression were not changed after NR4A3 over-expression or knock-down. E) Myosin Heavy Chain Protein expression were not changed after NR4A3 over-expression or knock-down. F) The gross morphology of differentiated C2C12 cells were not changed after NR4A3 over-expression or knock-down. All data are representatives over three time of independent experiments.

Figure S3A

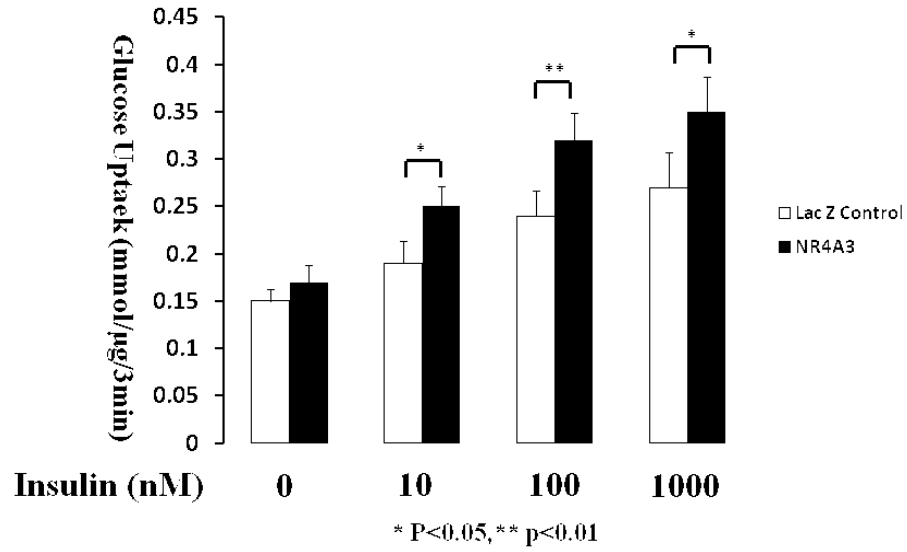

Figure S3B

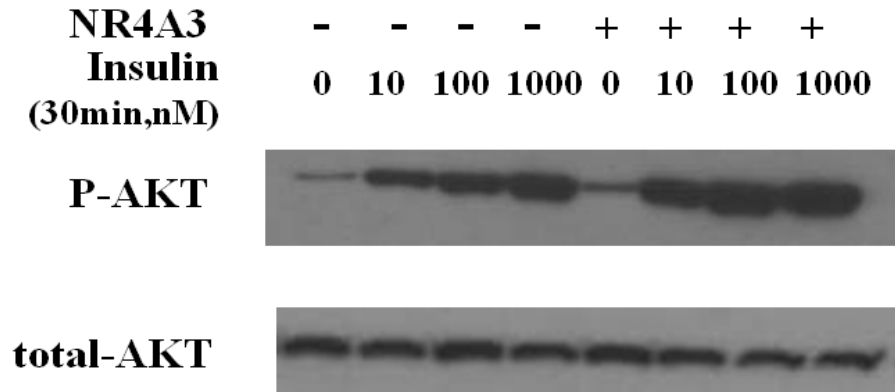

Figure S3C

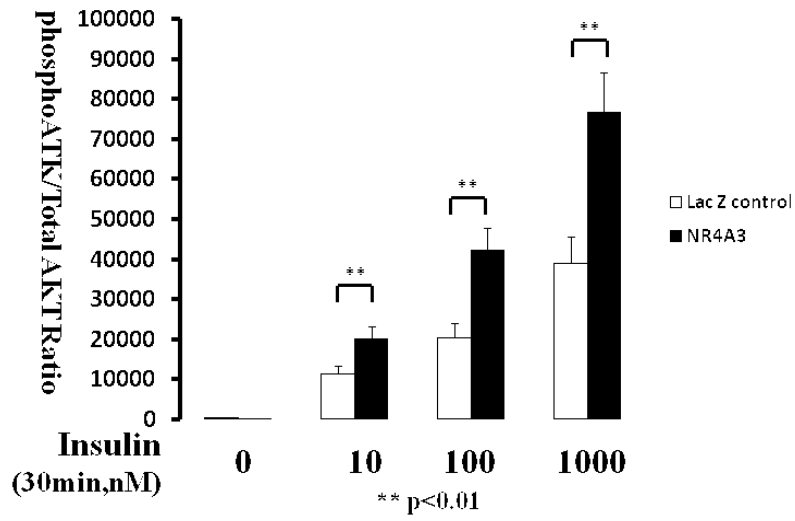

Figure S3D

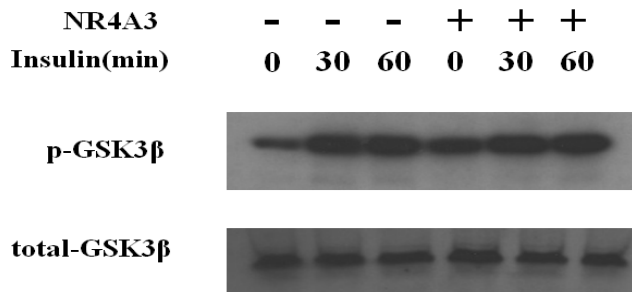



Figure S3E

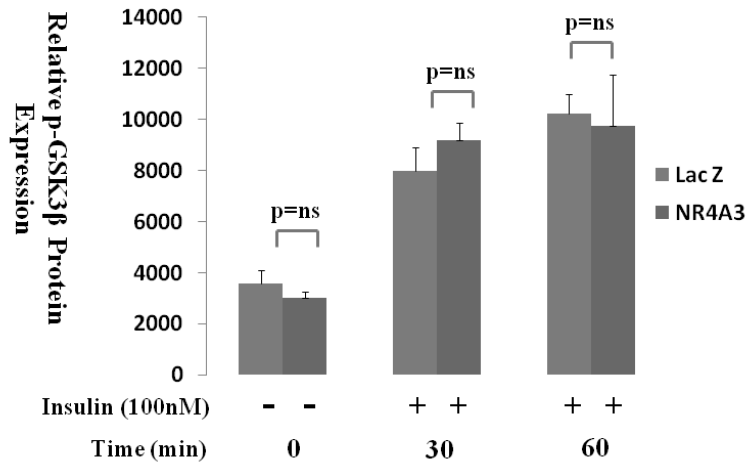

Figure S3: Function phenotypes of NR4A3 hyperexpression cell line. A) Quantification of Glucose Uptake in NR4A3 over-expressed C2C12 cell after different concentrations of insulin stimulation. B) NR4A3 hyperexpression results in enhanced insulin stimulated Akt phosphorylation in C2C12 cells at different insulin concentrations. C) Quantification of Akt Phosphorylation in C2C12 cells after different concentrations of insulin treatment. D) The insulin stimulated serine-9 GSK-3 $\beta$  phosphorylation in NR4A3 hyperexpressing C2C12 myocytes. E) Quantification of serine-9 GSK-3 $\beta$ /total GSK-3 $\beta$  ratio in NR4A3 hyperexpressing C2C12 myocytes. All data are representatives over three time of independent experiments.

Figure S4A

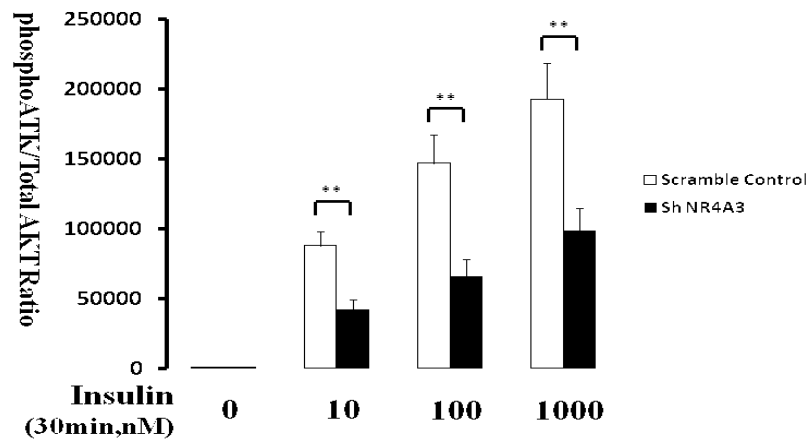

Figure S4B

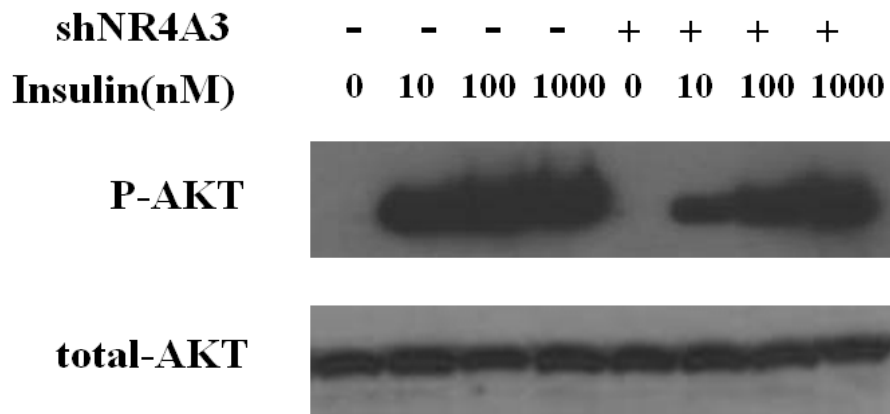

Figure S4C

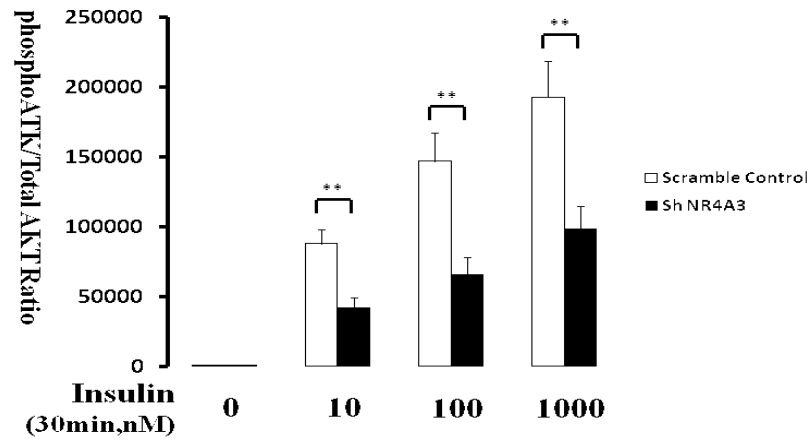

Figure S4D

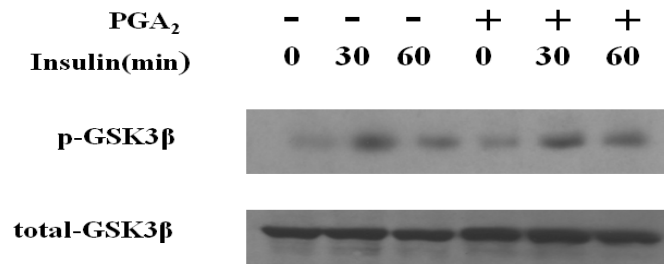

Figure S4E

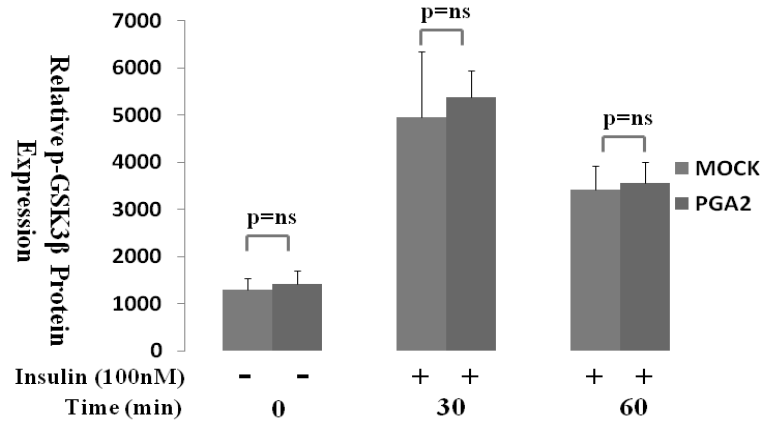

Figure S4: Function phenotypes of NR4A3 knock-down cell lines and the insulin stimulated serine-9 GSK-3 $\beta$  phosphorylation in PGA<sub>2</sub> treated C2C12 myocytes. A) Quantification of Glucose Uptake in NR4A3 knock-down C2C12 cell after different concentrations of insulin stimulation. B) NR4A3 knockdown results in decreased insulin stimulated Akt phosphorylation in C2C12 cells at different insulin concentrations. C) Quantification of Akt Phosphorylation in C2C12 cells after different concentrations of insulin treatment. D) The insulin stimulated serine-9 GSK-3 $\beta$  phosphorylation in PGA<sub>2</sub> treated C2C12 myocytes. E) Quantification of serine-9 GSK-3 $\beta$ /total GSK-3 $\beta$  ratio in PGA<sub>2</sub> treated C2C12 myocytes. All data are representatives over three time of independent experiments.

Figure S5A

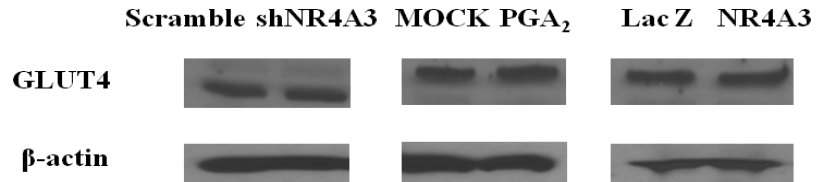

Figure S5B

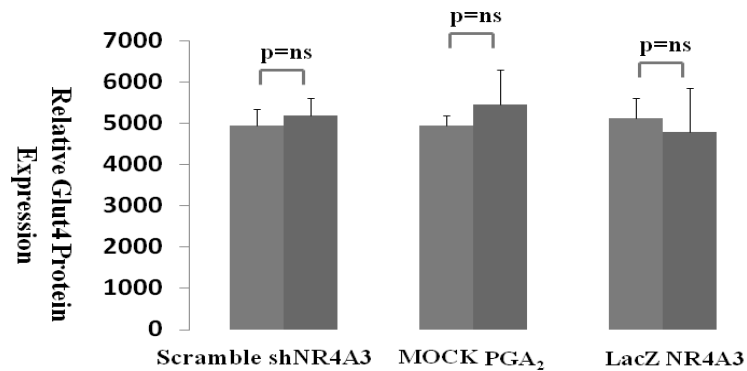

Figure S5: The Glut4 protein expression. A) The Glut4 protein expression in NR4A3 hyperexpressing, knockdown and PGA<sub>2</sub> treated C2C12 myocytes. B) Quantification of Glut4 protein expression in NR4A3 hyperexpressing, knockdown and PGA<sub>2</sub> treated C2C12 myocytes. All data are representatives over three time of independent experiments.
